# Supplementary material for: Use of Botulism Antitoxin Heptavalent (A, B, C, D, E, F, G)—(Equine) (BAT®) in Clinical Study Subjects and Patients: A 15-Year Systematic Safety Review
Source: MDPI journal article supplement (doi:10.3390/toxins14010019), 2021-12-27
Supplement: s1 [file s1]

# **Supplementary Materials: Use of Botulism Antitoxin Heptavalent (A, B, C, D, E, F, G) – (Equine) (BAT<sup>®</sup>) in Clinical Study Subjects and Patients: A 15-Year Systematic Safety Review**

Geraldine S. Parrera, Hugo Astacio, Priya Tunga, Deborah M. Anderson, Christine L. Hall and Jason S. Richardson

## **Supplementary Text S1**

### **Search terms and strategies**

#### **MEDLINE<sup>®</sup>/PubMed<sup>®</sup>**

("botulism"[MeSH Terms] OR "botulism"[All Fields] OR "clostridium botulinum"[All Fields]) AND (((("immune"[All Fields]) AND ("globulins"[MeSH Terms] OR "globulins"[All Fields] OR "globulin"[All Fields] OR "globulin fragments"[All Fields])) OR "antitoxin"[All Fields]) Filters: from 2005/1/1 - 2020/3/22

MeSH = Medical Subject Headings (MeSH<sup>®</sup>)

## Supplementary Text S2

### Brighton Collaboration

**Table 5. Brighton Collaboration Case Definition of Anaphylaxis.**

| Level of Diagnostic Certainty | Case Definition                                                                                                                                                                                                                                                                                                                                                                 |
|-------------------------------|---------------------------------------------------------------------------------------------------------------------------------------------------------------------------------------------------------------------------------------------------------------------------------------------------------------------------------------------------------------------------------|
| For all levels                | Anaphylaxis is a clinical syndrome characterized by:<br>sudden onset AND<br>rapid progression of signs and symptoms AND<br>involving multiple ( $\geq 2$ ) organ systems, as follows                                                                                                                                                                                            |
| Level 1                       | $\geq 1$ major dermatological AND<br>$\geq 1$ major cardiovascular AND/OR $\geq 1$ major respiratory criterion                                                                                                                                                                                                                                                                  |
| Level 2                       | $\geq 1$ major cardiovascular AND $\geq 1$ major respiratory criterion OR<br>$\geq 1$ major cardiovascular OR respiratory criterion AND<br>$\geq 1$ minor criterion involving $\geq 1$ different system ( <i>other than</i> cardiovascular or respiratory systems) OR<br>( $\geq 1$ major dermatologic) AND ( $\geq 1$ minor cardiovascular AND/OR minor respiratory criterion) |
| Level 3                       | $\geq 1$ minor cardiovascular OR respiratory criterion AND<br>$\geq 1$ minor criterion from each of $\geq 2$ different systems/categories                                                                                                                                                                                                                                       |

The case definition should be applied when there is no clear alternative diagnosis for the reported event to account for the combination of symptoms.

Extracted from Ruggeberg *et al.* [32].

**Table 6 Major and Minor Criteria Used in the Brighton Collaboration Case Definition of Anaphylaxis**

| Organ system            | Minor Criteria                                                                                                                                                                                                                                                                                                                                                  | Major Criteria                                                                                                                                                                                                                                                                                                                                                                                                                    |
|-------------------------|-----------------------------------------------------------------------------------------------------------------------------------------------------------------------------------------------------------------------------------------------------------------------------------------------------------------------------------------------------------------|-----------------------------------------------------------------------------------------------------------------------------------------------------------------------------------------------------------------------------------------------------------------------------------------------------------------------------------------------------------------------------------------------------------------------------------|
| Dermatologic or mucosal | <ul style="list-style-type: none"> <li>generalized pruritus without skin rash</li> <li>generalized prickle sensation</li> <li>localized injection site urticaria</li> <li>red and itchy eyes</li> </ul>                                                                                                                                                         | <ul style="list-style-type: none"> <li>generalized urticaria (hives) or generalized erythema</li> <li>angioedema (not hereditary), localized or generalized</li> <li>generalized pruritus with skin rash</li> </ul>                                                                                                                                                                                                               |
| Cardiovascular          | <ul style="list-style-type: none"> <li>Reduced peripheral circulation as indicated by the combination of at</li> <li>least 2 of the following:               <ul style="list-style-type: none"> <li>tachycardia</li> <li>a capillary refill time of <math>&gt;3</math> s without hypotension</li> <li>a decreased level of consciousness</li> </ul> </li> </ul> | <ul style="list-style-type: none"> <li>measured hypotension</li> <li>clinical diagnosis of uncompensated shock, indicated by the combination of at least 3 of the following:               <ul style="list-style-type: none"> <li>tachycardia</li> <li>capillary refill time <math>&gt;3</math> s</li> <li>reduced central pulse volume</li> <li>decreased level of consciousness or loss of consciousness</li> </ul> </li> </ul> |
| Respiratory             | <ul style="list-style-type: none"> <li>persistent dry cough</li> <li>hoarse voice</li> <li>difficulty breathing without wheeze or stridor</li> <li>sensation of throat closure</li> <li>sneezing, rhinorrhea</li> </ul>                                                                                                                                         | <ul style="list-style-type: none"> <li>bilateral wheeze (bronchospasm)</li> <li>stridor</li> <li>upper airway swelling (lip, tongue, throat, uvula, or larynx)</li> <li>respiratory distress—2 or more of the following:               <ul style="list-style-type: none"> <li>tachypnoea</li> </ul> </li> </ul>                                                                                                                   |

| Organ system     | Minor Criteria                                                                                                                | Major Criteria                                                                                                                                                                                            |
|------------------|-------------------------------------------------------------------------------------------------------------------------------|-----------------------------------------------------------------------------------------------------------------------------------------------------------------------------------------------------------|
|                  |                                                                                                                               | <ul style="list-style-type: none"> <li>○ increased use of accessory respiratory muscles (sternocleidomastoid, intercostals, etc.)</li> <li>○ recession</li> <li>○ cyanosis</li> <li>○ grunting</li> </ul> |
| Gastrointestinal | <ul style="list-style-type: none"> <li>• diarrhoea</li> <li>• abdominal pain</li> <li>• nausea</li> <li>• vomiting</li> </ul> | Not applicable                                                                                                                                                                                            |
| Laboratory       | <ul style="list-style-type: none"> <li>• Mast cell tryptase elevation &gt; upper normal limit</li> </ul>                      | Not applicable                                                                                                                                                                                            |

Adapted from Ruggeberg *et al.* [32].

## Reference

32. Ruggeberg, J.U.; Gold, M.S.; Bayas, J.M.; Blum, M.D.; Bonhoeffer, J.; Friedlander, S.; de Souza Brito, G.; Heininger, U.; Imoukhuede, B.; Khamesipour, A., et al. Anaphylaxis: case definition and guidelines for data collection, analysis, and presentation of immunization safety data. *Vaccine* **2007**, *25*, 5675–5684, doi:10.1016/j.vaccine.2007.02.064.

### Supplementary Text S3

#### Assessment of BAT Product Related Hypersensitivity Reactions

| Case Source <sup>1</sup>                 | Subset            | Onset                  | Adverse Event (MedDRA PT)          | Description                                                                                                     | Anaphylaxis Determination (by PV Physician)                                                                                                                        |
|------------------------------------------|-------------------|------------------------|------------------------------------|-----------------------------------------------------------------------------------------------------------------|--------------------------------------------------------------------------------------------------------------------------------------------------------------------|
| Clinical Study <sup>2</sup><br>Subject 1 | Healthy Volunteer | During infusion        | Urticaria, Pruritus, Skin disorder | Infusion stopped 52 mins after onset of BAT product infusion. Treated with Epinephrine and Diphenhydramine.     | Case presented two minor criteria (urticaria was not generalized) of the same dermatological class. Not anaphylaxis. Probable anaphylaxis was prevented.           |
| Clinical Study <sup>2</sup><br>Subject 2 | Healthy Volunteer | Same day of infusion   | Pruritus generalised, Urticaria    | Subject developed itchy welts 1.5-4 cm in diameter on scalp and mandible.                                       | Case presented one major (pruritus generalized) and one minor criterion (urticaria was not generalized) of the dermatological class. Not anaphylaxis.              |
| Clinical Study <sup>2</sup><br>Subject 3 | Healthy Volunteer | Same day of infusion   | Swelling                           | Temporal swelling in the right arm 42 mins after infusion onset, Resolved after one hour.                       | Assumed angioedema, a major criterion of the dermatological class. Not anaphylaxis.                                                                                |
| Clinical Study <sup>2</sup><br>Subject 4 | Healthy Volunteer | Same day of infusion   | Throat irritation                  | No other information received; conservatively considered associated to hypersensitivity.                        | Assumed angioedema, a major criterion of dermatological. Not anaphylaxis.                                                                                          |
| Clinical Study <sup>3</sup><br>Subject 5 | Healthy Volunteer | During infusion        | Urticaria                          | Infusion was immediately terminated and treated with Benadryl and Solumedrol.                                   | Urticaria was not generalized, considered as one minor of the dermatological criterion. Possible medication prevented progression to anaphylaxis. Not anaphylaxis. |
| Clinical Study <sup>4</sup><br>Subject 6 | Not botulism      | During infusion        | Bronchospasm, Tachycardia          | Subject treated with Solu-Medrol and Benadryl. BAT product infusion rate decreased. Subject received full dose. | Case presented one major respiratory and one minor cardiovascular criterion. Case met level 2 of the diagnostic certainty criteria of anaphylaxis.                 |
| Clinical Study <sup>4</sup><br>Subject 7 | Botulism          | 12 days after infusion | Serum sickness                     | Delayed reaction. Serum sickness associated with myalgia and arthralgia.                                        | Serum sickness is not an acute hypersensitivity. Not anaphylaxis.                                                                                                  |
| Clinical Study <sup>4</sup><br>Subject 8 | Botulism          | Day after infusion     | Rash                               | No other information                                                                                            | Case presented one minor criterion of the dermatological class. Not anaphylaxis.                                                                                   |

| Case Source <sup>1</sup>                  | Subset       | Onset                     | Adverse Event (MedDRA PT)                                               | Description                                                                                                                                                                                 | Anaphylaxis Determination (by PV Physician)                                                                     |
|-------------------------------------------|--------------|---------------------------|-------------------------------------------------------------------------|---------------------------------------------------------------------------------------------------------------------------------------------------------------------------------------------|-----------------------------------------------------------------------------------------------------------------|
| Clinical Study <sup>4</sup><br>Subject 9  | Botulism     | Day after infusion        | Rash                                                                    | No other information                                                                                                                                                                        | Case presented one minor criterion of the dermatological class. Not anaphylaxis.                                |
| Clinical Study <sup>4</sup><br>Subject 10 | Not botulism | Day after infusion        | Rash                                                                    | No other information                                                                                                                                                                        | Case presented one minor criterion of the dermatological class. Not anaphylaxis.                                |
| Patient Registry<br>Case 1                | Botulism     | During infusion           | Serum sickness-like reaction                                            | Patient developed “Serum sickness-like reaction”. Infusion was interrupted halfway and was restarted after 50 mins. Infusion was completed without problems.                                | Hypersensitivity diagnosis reported. Not anaphylaxis.                                                           |
| Patient Registry<br>Case 2                | Botulism     | Same day of infusion      | Hypersensitivity                                                        | Mild rash and flushing after the infusion. Resolved spontaneously. Reported as diagnosis.                                                                                                   | Hypersensitivity diagnosis reported. The rash presented is one minor dermatological criterion. Not anaphylaxis. |
| Patient Registry<br>Case 3                | Botulism     | Same day of infusion      | Dermatitis allergic                                                     | Patient developed an allergic skin reaction - generalized erythema (red warm area to left forearm, bilateral shoulders and back) within an hour after infusion onset. Infusion was stopped. | Case met one major of dermatological. Not anaphylaxis.                                                          |
| Patient Registry<br>Case 4                | Botulism     | Same day of infusion      | Serum sickness-like reaction                                            | Reported as diagnosis.                                                                                                                                                                      | Hypersensitivity diagnosis reported. Not anaphylaxis.                                                           |
| Patient Registry<br>Case 5                | Botulism     | Three days after infusion | Rash                                                                    | Mild rash on the back, buttocks and thighs.                                                                                                                                                 | Case presented one minor criterion of the dermatological criterion. Not anaphylaxis                             |
| Patient Registry<br>Case 6                | Not botulism | During infusion           | Anaphylactic reaction                                                   | Anaphylactic reaction occurred within one hour after infusion started. Infusion stopped.                                                                                                    | Anaphylaxis diagnosis reported. Further anaphylaxis assessment not required.                                    |
| Spontaneous<br>Case 7                     | Botulism     | Same day of infusion      | Anaphylactic shock, Hemodynamic instability, Hypotension, Lip swelling, | Anaphylactic shock occurred a few hours after infusion. Hemodynamic instability was due to anaphylaxis.                                                                                     | Anaphylaxis diagnosis reported. Further anaphylaxis assessment not required.                                    |

| Case Source <sup>1</sup> | Subset       | Onset                       | Adverse Event (MedDRA PT)     | Description                                                                                                                                        | Anaphylaxis Determination (by PV Physician)                                                                                                   |
|--------------------------|--------------|-----------------------------|-------------------------------|----------------------------------------------------------------------------------------------------------------------------------------------------|-----------------------------------------------------------------------------------------------------------------------------------------------|
|                          |              |                             | Swelling, Distributive shock  |                                                                                                                                                    |                                                                                                                                               |
| Spontaneous Case 8       | Botulism     | Same day of infusion        | Swollen tongue                | Considered as angioedema.                                                                                                                          | Case presented one major criterion of the dermatological class. Not anaphylaxis.                                                              |
| Spontaneous Case 9       | Botulism     | During infusion             | Hypersensitivity, Urticaria   | Allergic reaction occurred within one hour after infusion onset. Infusion was re-started after 16 hours, and completed without problems.           | Hypersensitivity diagnosis reported. Urticaria was not generalized, considered as one minor of the dermatological criterion. Not anaphylaxis. |
| Spontaneous Case 10      | Botulism     | During infusion             | Anaphylactic reaction         | A patient developed anaphylaxis during BAT-product infusion. The infusion was stopped.                                                             | Anaphylaxis diagnosis reported. Further anaphylaxis assessment not required.                                                                  |
| Spontaneous Case 11      | Botulism     | Four hours after infusion   | Hypersensitivity, Hypotension | Possible anaphylaxis. Reported as life threatening condition.                                                                                      | Case met level 2 of diagnostic certainty criteria of anaphylaxis.                                                                             |
| Spontaneous Case 12      | Not botulism | Same day of infusion        | Rash Erythematous             | Mild erythematous rash 15 hours after infusion, resolved spontaneously and lasted one min. Transient reaction, self resolved.                      | Rash is one minor criterion of the dermatological class. Not anaphylaxis.                                                                     |
| Spontaneous Case 13      | Botulism     | Fifteen days after infusion | Urticaria                     | Delayed reaction two weeks post infusion, possibly caused by Clindamycin.                                                                          | It doesn't meet the term of acute. Urticaria was not generalized, considered as minor criterion of the dermatological class. Not anaphylaxis. |
| Spontaneous Case 14      | Botulism     | Same day of infusion        | Flushing                      | Self limited reaction several hours after infusion; healthcare provider was unsure if it was an allergic reaction.                                 | Not anaphylaxis                                                                                                                               |
| Spontaneous Case 15      | Not botulism | During the infusion         | Anaphylactic reaction         | Hypersensitivity reaction with itching, flushing, brief hypotension. The infusion was stopped, treated with diphenhydramine, Solumedrol and normal | Anaphylaxis diagnosis reported. Further anaphylaxis assessment not required.                                                                  |

| Case Source <sup>1</sup> | Subset       | Onset               | Adverse Event (MedDRA PT) | Description                                                                                                                                                                                                                                                                                                                                                                                                                                                                                                                                                           | Anaphylaxis Determination (by PV Physician)                                                                                                                                                                                            |
|--------------------------|--------------|---------------------|---------------------------|-----------------------------------------------------------------------------------------------------------------------------------------------------------------------------------------------------------------------------------------------------------------------------------------------------------------------------------------------------------------------------------------------------------------------------------------------------------------------------------------------------------------------------------------------------------------------|----------------------------------------------------------------------------------------------------------------------------------------------------------------------------------------------------------------------------------------|
|                          |              |                     |                           | saline. BAT product infusion was completed. The symptoms did not appear during the re-challenge of the product.                                                                                                                                                                                                                                                                                                                                                                                                                                                       |                                                                                                                                                                                                                                        |
| Spontaneous Case 16      | Not botulism | During the infusion | Hypersensitivity          | The patient developed tingling in her vaginal area with inflammation around the peri-vulvar area, rash and hypotension during the infusion. The infusion was stopped. She was treated with normal saline and Benadryl. BAT product infusion was resumed at a rate of 0.5 mL/min for about 30 mins, then increased the rate to 1 mL/min, 40 mins later, the infusion was stopped with 10 cc BAT left to infuse as the patient again developed hypotension and diffuse hives. She was given another bolus of normal saline and IV Benadryl as well as Decadron 4 mg IV. | Hypersensitivity diagnosis reported. The associated hypersensitivity symptoms meet one major of cardiovascular and one major and one minor of dermatological criterion or level 1 of the diagnostic certainty criteria of anaphylaxis. |

<sup>1</sup>One case refers to one individual.

<sup>2</sup>From EBCI sponsored clinical study BT-001.

<sup>3</sup>From EBCI sponsored clinical study BT-002.

<sup>4</sup>From CDC's EAP.
